# Supplementary material for: Virulence studies of Enterobacter sakazakiiisolates associated with a neonatal intensive care unit outbreak
Source: Springer Nature journal article supplement (doi:10.1186/1471-2180-8-64), 2008-04-18

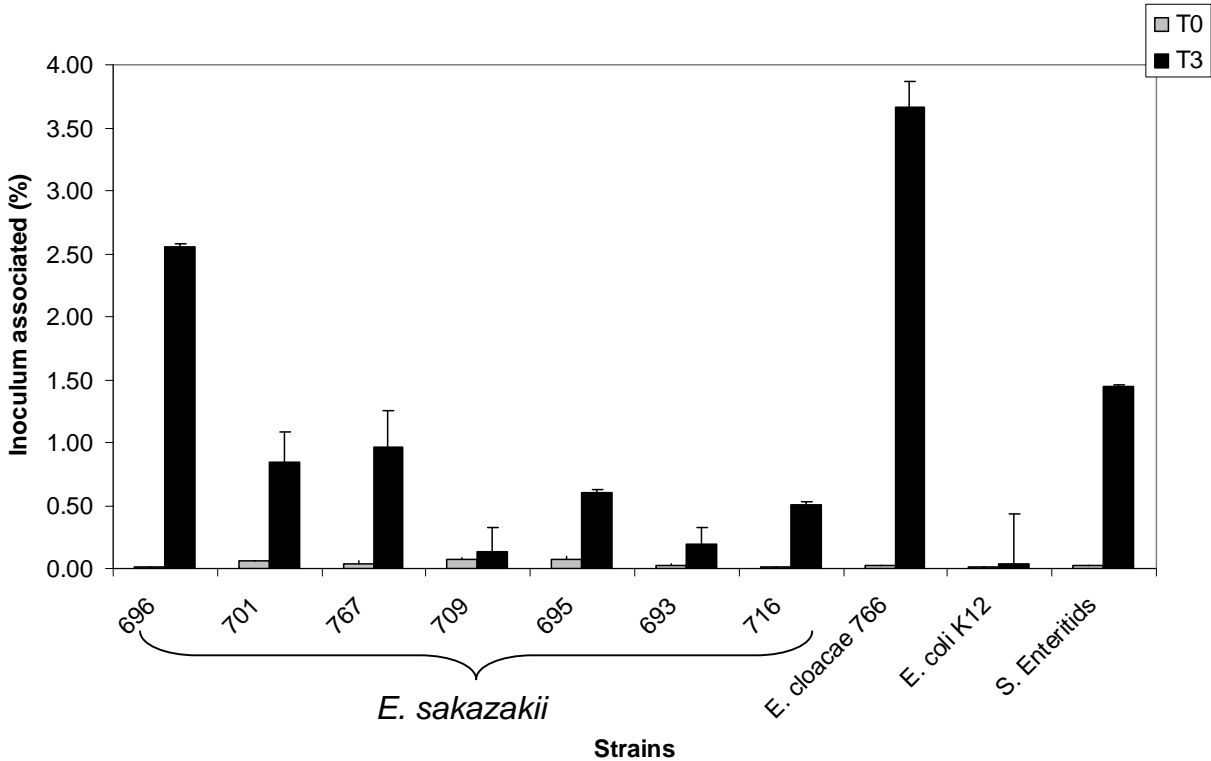

Supplement: 12866_2007_497_MOESM1_ESM.pdf [file 12866_2007_497_MOESM1_ESM.pdf]
